# Supplementary material
Source: MDPI journal article supplement (https://www.mdpi.com/2071-1050/14/6/3434)
Supplement: s1 [file s1 › sustainability-1556772-supplementary.pdf]

Supplementary material

# The Effect of Whey Protein Films with Ginger and Rosemary Essential Oils on Microbiological Quality and Physicochemical Properties of Minced Lamb Meat

Maria Tsironi, Ioanna S. Kosma and Anastasia V. Badeka \*

Laboratory of Food Chemistry, Department of Chemistry, University of Ioannina, 45110-Ioannina, Greece; maria\_tsirwni@hotmail.gr (M.T.); i.kosma@uoi.gr (I.S.K.)

\* Correspondence: abadeka@uoi.gr Tel: +00302651008705

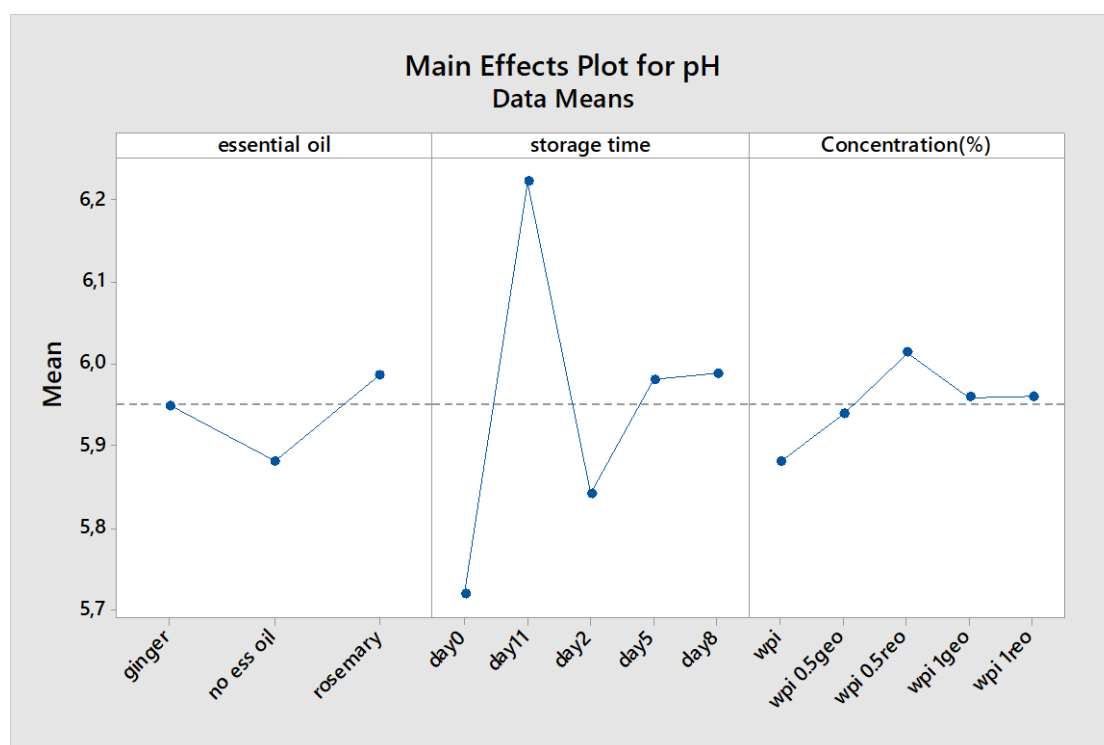

**Figure S1.** Main effects plot for essential oil, their concentration and storage time on the pH values of minced lamb meat samples packaged with different types of WPI films.

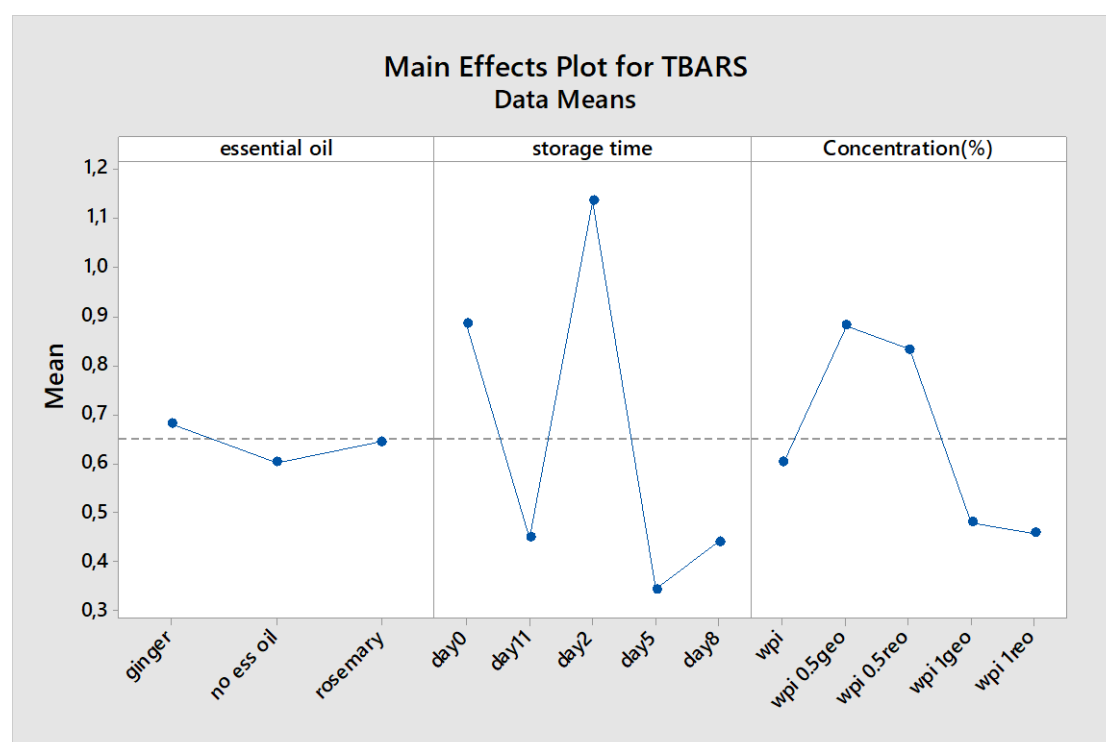

**Figure S2.** Main effects plot for essential oil, their concentration and storage time on TBARS values of minced lamb meat samples packaged with different types of WPI films.

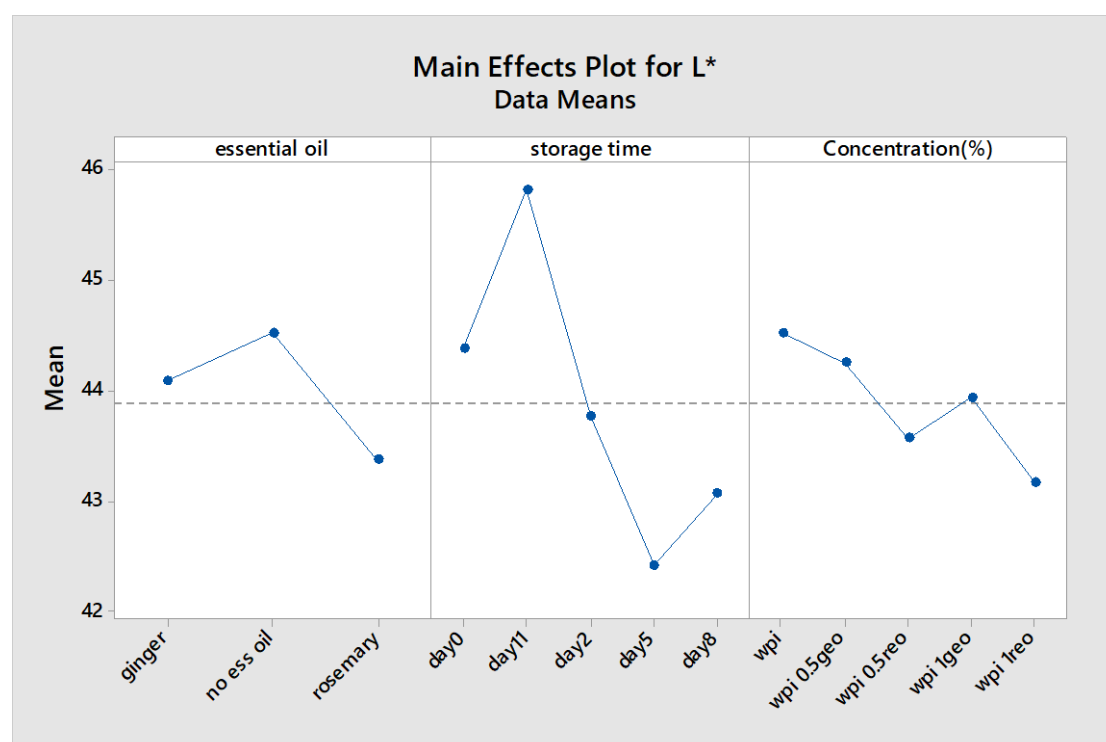

**Figure S3.** Main effects plot for essential oil, their concentration and storage time on L\* parameter (brightness) values of minced lamb meat samples packaged with different types of WPI films.

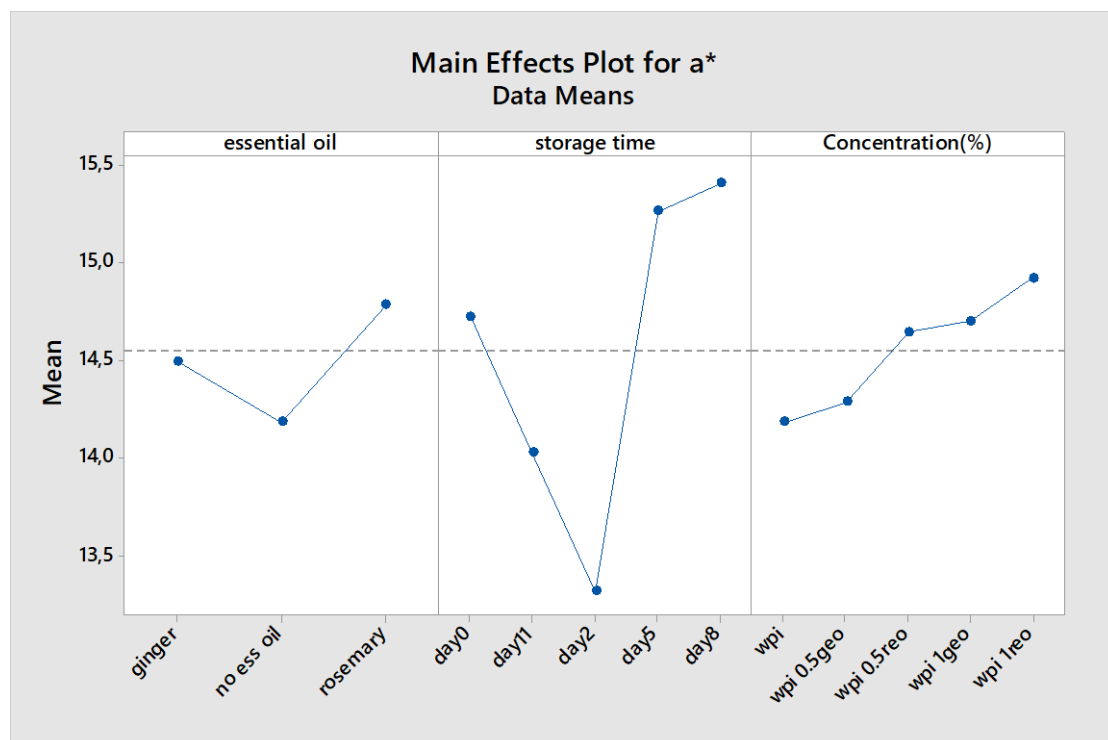

**Figure S4.** Main effects plot for essential oil, their concentration and storage time on a\* parameter (redness) values of minced lamb meat samples packaged with different types of WPI films.

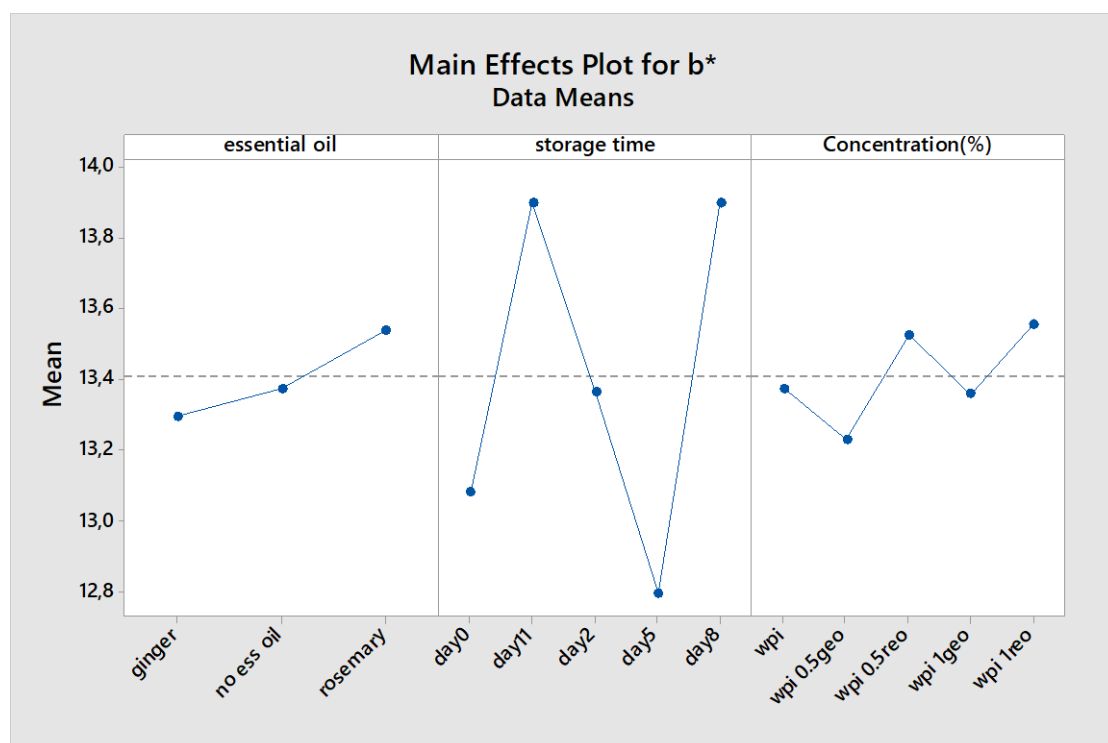

**Figure S5.** Main effects plot for essential oil, their concentration and storage time on b\* parameter (yellowness) values of minced lamb meat samples packaged with different types of WPI films.

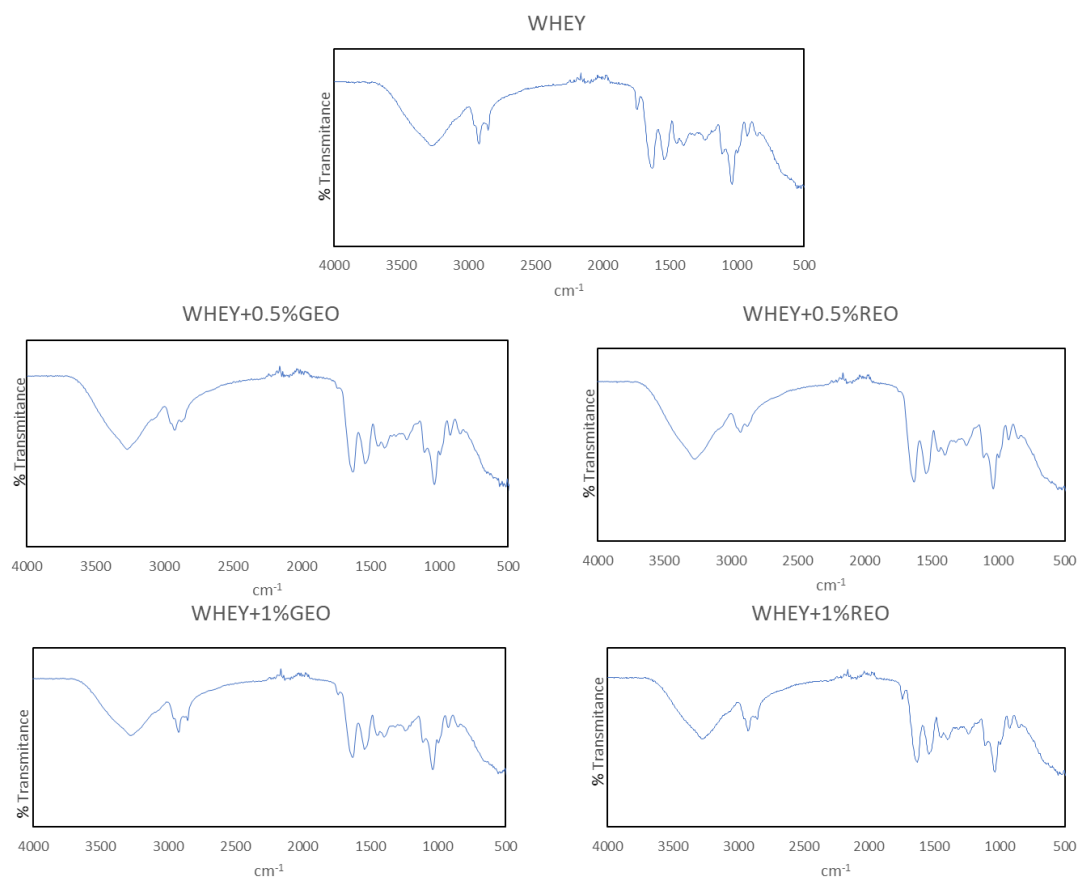

**Figure S6.** FTIR-ATR spectra of WPI films with and without EOs at different concentrations.

**Table S1.** Compositional analysis (%) of Ginger and Rosemary essential oils.

|                             | Ginger | Rosemary |
|-----------------------------|--------|----------|
| 2-Hexen-1-ol                |        | 1.27     |
| $\alpha$ -Thujene           |        | 0.60     |
| $\alpha$ -Pinene            | 2.69   | 27.82    |
| Camphene                    | 8.01   | 8.56     |
| 1-Octen-3-ol                |        | 0.15     |
| 3-Octanone                  |        | 0.88     |
| $\beta$ -Myrcene            | 0.92   | 2.50     |
| $\beta$ -Pinene             | 0.55   | 5.12     |
| $\alpha$ -Phellandrene      |        | 0.31     |
| $\beta$ -Phellandrene       | 11.52  |          |
| p-Cymene                    |        | 0.13     |
| Limonene                    |        | 2.74     |
| 1,8-Cineole                 |        | 8.33     |
| Benzene acetaldehyde        |        | 0.25     |
| Terpinolene                 | 0.36   | 1.43     |
| Linalool                    | 0.87   | 1.68     |
| Camphor                     | 0.35   | 7.25     |
| Borneol                     | 2.55   | 4.41     |
| $\alpha$ -(-)-Terpinen-4-ol | 1.36   | 2.94     |
| $\alpha$ -Terpineol         | 0.85   | 1.29     |
| (E)-Citral                  | 4.09   |          |
| (E)-Geraniol                | 0.67   |          |
| $\beta$ -Citral             | 7.32   |          |
| Verbenone                   |        | 2.91     |
| Bornyl acetate              | 0.36   | 15.37    |
| Methyl nonyl ketone         | 0.55   |          |
| (E)-Caryophyllene           |        | 2.78     |
| $\beta$ -Caryophyllene      |        | 0.53     |
| Caryophyllene oxide         |        | 0.75     |
| $\alpha$ -Copaene           | 0.75   |          |
| Geranyl acetate             | 0.25   |          |
| $\beta$ -Farnesene          | 0.75   |          |
| (-) Alloaromadendrene       | 0.68   |          |
| $\beta$ -Germacrene         | 0.59   |          |
| $\beta$ -Cedrenol           | 0.85   |          |
| Neral                       | 0.78   |          |
| ar-Curcumene                | 11.38  |          |
| $\alpha$ -Zingiberene       | 18.64  |          |
| $\beta$ -Bisabolene         | 7.95   |          |
| $\beta$ -Sesquiphellandrene | 8.39   |          |
| (E)- $\gamma$ -Bisabolene   | 0.75   |          |
| $\beta$ -Eudesmol           | 0.55   |          |
| Nerolidol                   | 0.78   |          |
| (+)- $\alpha$ -Bisabolol    | 0.56   |          |
| (-)-Campherenone            | 1.56   |          |
| (Z,E)-Farnesal              | 0.75   |          |
| Thujopsene                  | 1.02   |          |
